# Supplementary material for: Voltage‐Controlled Switching of Strong Light–Matter Interactions using Liquid Crystals
Source: PubMed Central journal article supplement — Chemistry. 2017 Dec 7;23(72):18166–70. doi: 10.1002/chem.201705461 (PMC5814857; doi:10.1002/chem.201705461), 2017-12-07
Supplement: CHEM-23-18166-s001.pdf [file CHEM-23-18166-s001.pdf]

# CHEMISTRY

## A **European** Journal

### Supporting Information

#### **Voltage-Controlled Switching of Strong Light–Matter Interactions using Liquid Crystals**

Manuel Hertzog,<sup>[a]</sup> Per Rudquist,<sup>[b]</sup> James A. Hutchison,<sup>[c]</sup> Jino George,<sup>[c]</sup>  
Thomas W. Ebbesen,<sup>[c]</sup> and Karl Börjesson<sup>\*[a]</sup>

chem\_201705461\_sm\_miscellaneous\_information.pdf

**Supporting information for:**  
**“Voltage controlled switching of strong  
light–matter interactions using liquid crystals”**

Manuel Hertzog,<sup>†</sup> Per Rudquist,<sup>‡</sup> Jino George,<sup>¶</sup> James A. Hutchison,<sup>¶</sup> Thomas  
W. Ebbesen,<sup>¶</sup> and Karl Börjesson<sup>\*,†</sup>

<sup>†</sup>*Department of Chemistry and Molecular Biology, University of Gothenburg, Kemigården  
4, 412 96 Gothenburg, Sweden*

<sup>‡</sup>*Department of Microtechnology and Nanoscience, MC2, Chalmers University of  
Technology, Kemivägen 9, 412 96 Gothenburg, Sweden*

<sup>¶</sup>*ISIS & icFRC, University of Strasbourg and CNRS, 8 allée Gaspard Monge, 67000  
Strasbourg, France*

E-mail: [karl.borjesson@gu.se](mailto:karl.borjesson@gu.se)

## Contents

|                           |   |
|---------------------------|---|
| Cavity description        | 2 |
| Switching voltage         | 3 |
| Rabi–splitting vs voltage | 4 |
| Sample holder             | 5 |

# Cavity description

Cavity thickness measurement was calculated using:

$$d = \frac{m}{2} \left( \frac{\lambda_1 \cdot \lambda_2}{\lambda_1 - \lambda_2} \right) \quad (1)$$

And was corrected with the refractive index of the medium:

$$d_{eff} = \frac{d}{n_{medium}} \quad (2)$$

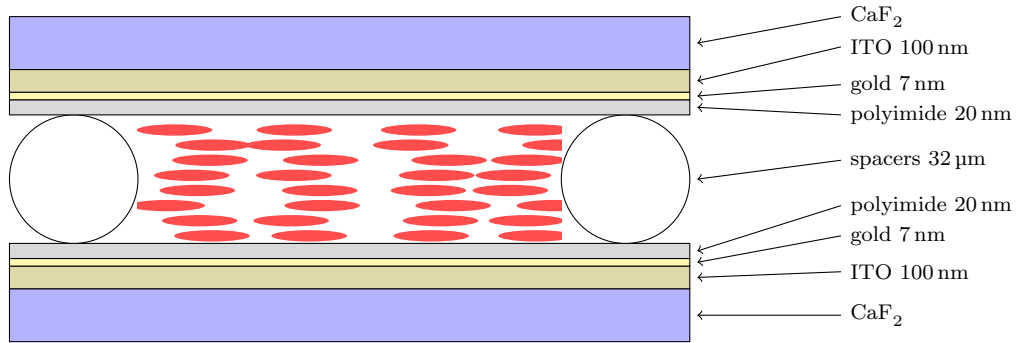

**Figure S1:** *Cavity cross-section of a processed cavity.*

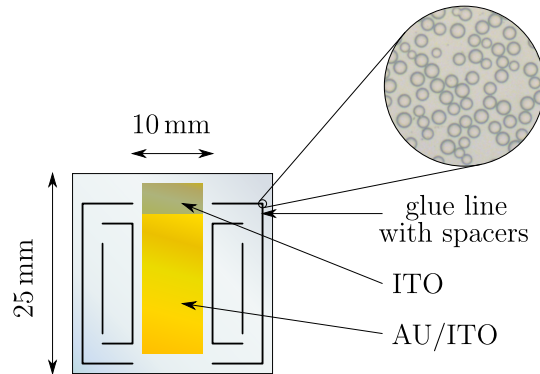

**Figure S2:** *Top-view of a processed substrate before sealing. Glue lines are optimized to avoid bending of the  $\text{CaF}_2$  substrates.*

## Switching voltage

Switching voltage experiment was performed on a UV/VIS spectrophotometer (Lambda 650, Perkin Elmer). The sample was put between crossed polarizers and the transmission was recorded at 452 nm.

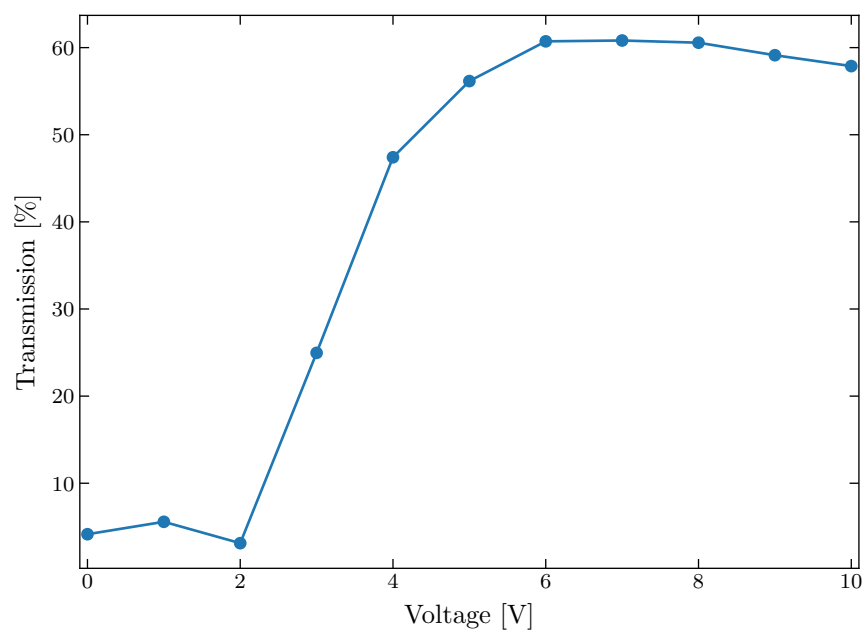

**Figure S3:** *Switching voltage of 5CB.*

## Rabi-splitting vs voltage

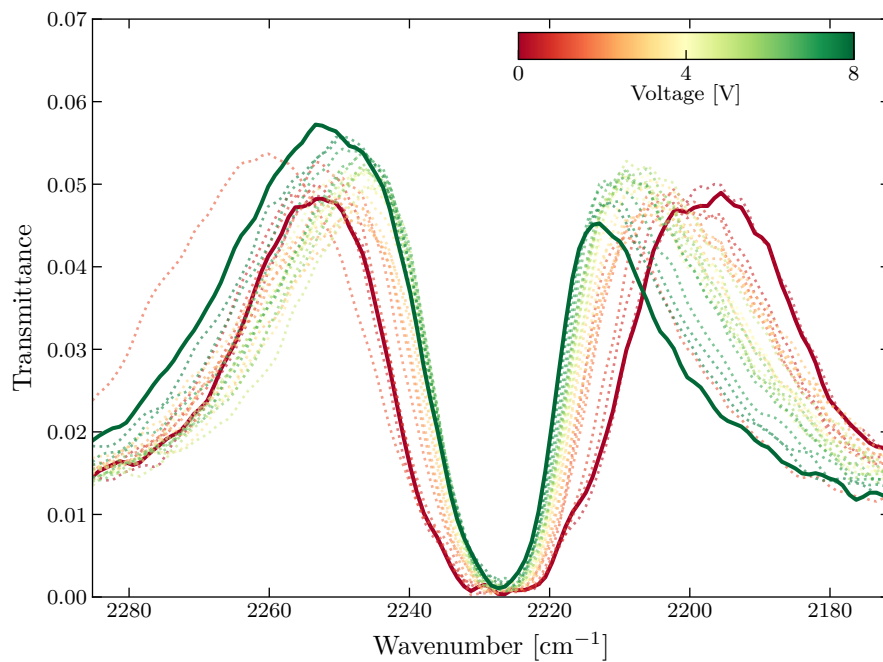

**Figure S4:** Raw data from Fig. 4a.

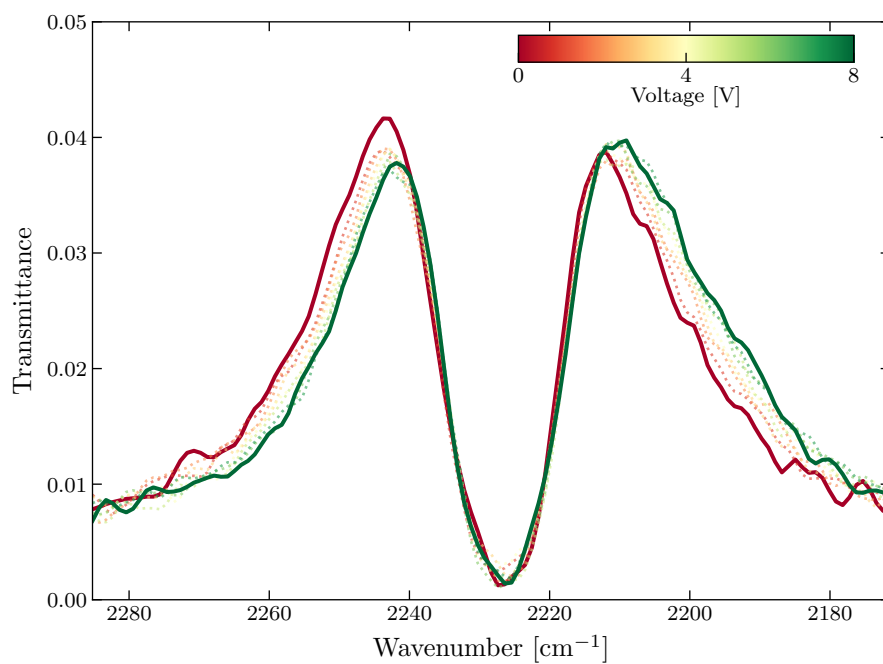

**Figure S5:** Raw data from Fig. 4b.

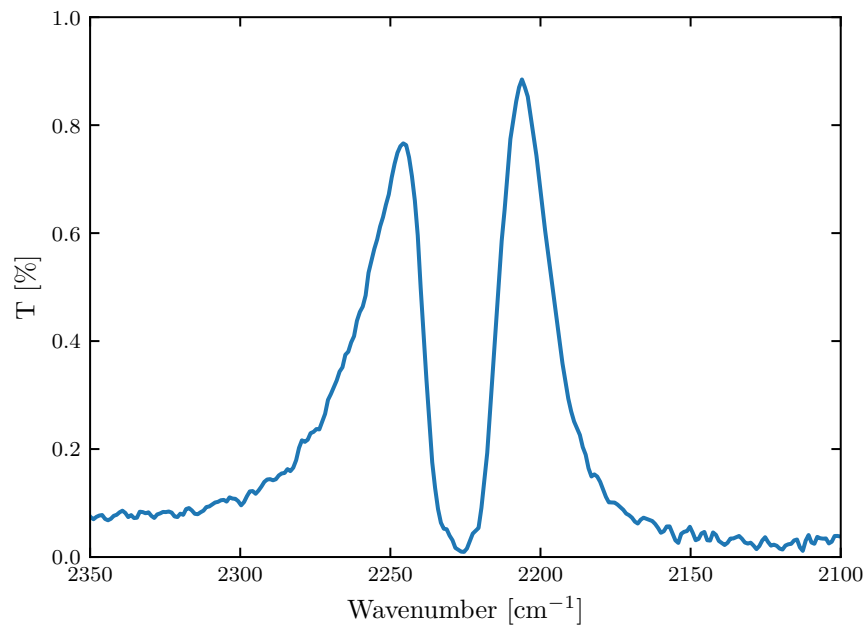

**Figure S6:** *Transmission spectrum of 5CB in an isotropic phase. The value of the splitting is  $\hbar\Omega_R = 40 \text{ cm}^{-1}$*

## Sample holder

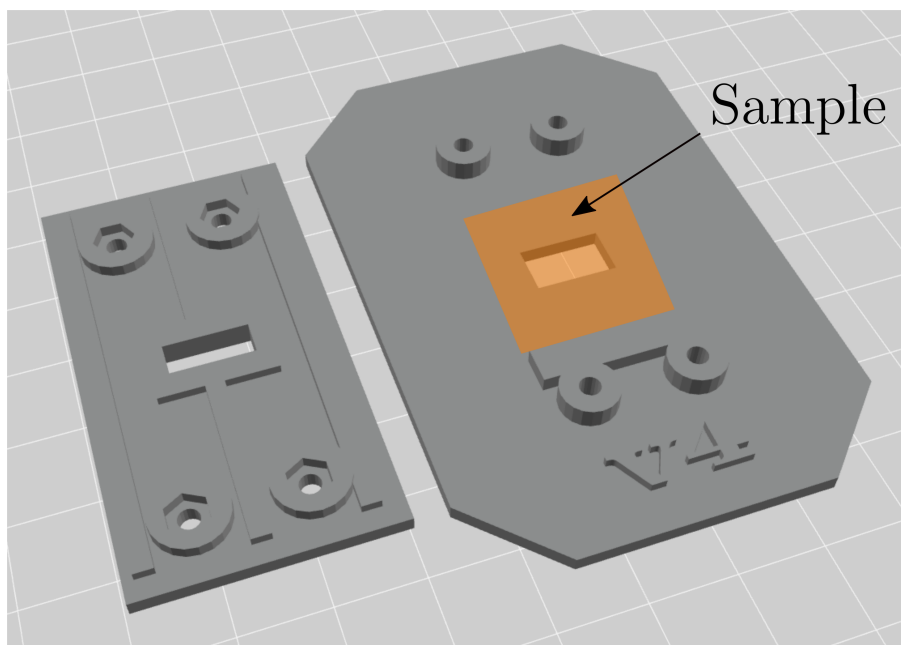

**Figure S7:** *Sample holder made with a 3D printer. The sample is put between the two plates. The dimension of the sample holder is standard FTIR sample holder size.*
